# Supplementary material for: Follicular Helper and Regulatory T Cells Drive the Development of Spontaneous Epstein–Barr Virus Lymphoproliferative Disorder
Source: MDPI journal article supplement (doi:10.3390/cancers15113046), 2023-06-03
Supplement: s1 [file s1]

**Table S1.** Characteristics of the Study Cohort.

| LPD classification | Donor ID | Gender | % of mice with EBV-LPD | Latency time to EBV-LPD |
|--------------------|----------|--------|------------------------|-------------------------|
| High-Incidence     | HI-1     | Male   | 100                    | 8 weeks                 |
|                    | HI-2     | Male   | 100                    | 6-8 weeks               |
|                    | HI-3     | Male   | 100                    | 6-8 weeks               |
|                    | HI-4     | Female | 100                    | 6-8 weeks               |
|                    | HI-5     | Female | 100                    | 6-8 weeks               |
| No-Incidence       | NI-1     | Male   | 0                      | n/a                     |
|                    | NI-2     | Female | 0                      | n/a                     |
|                    | NI-3     | Female | 0                      | n/a                     |
|                    | NI-4     | Male   | 0                      | n/a                     |

**Table S2.** List of antibodies for mass cytometry analysis.

| Ab           | Metal | Clone    | Company       | Amount per 100 $\mu$ l |
|--------------|-------|----------|---------------|------------------------|
| CD3          | 113In | HIR2     | Biolegend     | 1                      |
| CD45         | 115In | HI30     | Biolegend     | 1                      |
| IFN $\gamma$ | 139La | B27      | Biolegend     | 1                      |
| cPARP        | 140Ce | F21-852  | BD Pharmingen | 1                      |
| CCR6         | 141Pr | G034E3   | Biolegend     | 1                      |
| CD107a       | 142Nd | H4A3     | Biolegend     | 1                      |
| T-bet        | 143Nd | eBio4B10 | eBioscience   | 1                      |

|                  |       |          |                   |   |
|------------------|-------|----------|-------------------|---|
| CD94             | 144Nd | HP-3D9   | BD<br>Biosciences | 1 |
| CD4              | 145Nd | RPA-T4   | Biolegend         | 1 |
| CD8              | 146Nd | RPA-T8   | Biolegend         | 1 |
| CD56             | 147Sm | NCAM16.2 | BD<br>Biosciences | 1 |
| CD154<br>(CD40L) | 148Nd | 24-31    | Biolegend         | 1 |
| CD127            | 149Sm | A019D5   | Biolegend         | 1 |
| CCR4             | 150Nd | 205410   | R&D<br>systems    | 1 |
| ICOS             | 151Eu | DX29     | BD<br>Biosciences | 1 |
| CD33             | 152Sm | P67.6    | Biolegend         | 1 |
| HLA-DR           | 153Eu | L243     | Biolegend         | 1 |
| CD69             | 154Sm | FN50     | Biolegend         | 1 |
| PD-1             | 155Gd | EH12.2H7 | Biolegend         | 1 |
| CXCR3            | 156Gd | G025H7   | Fluidigm          | 1 |
| CD62L            | 157Gd | DREG-56  | Biolegend         | 1 |
| CD27             | 158Gd | L128     | Fluidigm          | 1 |
| CXCR5            | 159Tb | J252D4   | Biolegend         | 1 |
| CD14             | 160Gd | M5E2     | Biolegend         | 1 |
| CD16             | 161Dy | 3G8      | Biolegend         | 1 |
| Foxp3            | 162Dy | PCH101   | Fluidigm          | 1 |
| GATA3            | 163Dy | 16E14A23 | Biolegend         | 1 |
| GITR             | 164Dy | 108-17   | Biolegend         | 1 |
| CD45RO           | 165Ho | UCHL1    | Biolegend         | 1 |

|        |       |           |                   |     |
|--------|-------|-----------|-------------------|-----|
| NKG2D  | 166Er | 1D11      | Biolegend         | 1.5 |
| CCR7   | 167Er | G043H7    | Fluidigm          | 1   |
| RORgt  | 168Er | 600214    | Fluidigm          | 1   |
| CD25   | 169Tm | 2A3       | BD<br>Biosciences | 1   |
| CTLA-4 | 170Er | 14D3      | eBioscience       | 1   |
| GRZB   | 171Yb | QA16A02   | Biolegend         | 1   |
| PD-L1  | 172Yb | 24F.10C12 | Fluidigm          | 1   |
| CD19   | 173Yb | H1B19     | BD<br>Biosciences | 1   |
| CD15   | 174Yb | W6D3      | Biolegend         | 1   |
| CD20   | 175Lu | 2H7       | Biolegend         | 1   |
| Bcl6   | 176Yb | IG191E/A8 | Biolegend         | 1   |
| CD11b  | 209Bi | ICRF44    | Biolegend         | 1   |

**Table S3.** Cells number for mouse engraftment in the Th subset depletion experiment.

| Donor | % of CD4+<br>T in CD45 | Abs CD4<br>Depleted<br>PBMC<br>Engrafted | % of Tfh in<br>CD45 | Abs Tfh<br>Depleted<br>PBMC<br>Engrafted | % of Treg<br>in CD45 | Abs Treg<br>Depleted<br>PBMC<br>Engrafted |
|-------|------------------------|------------------------------------------|---------------------|------------------------------------------|----------------------|-------------------------------------------|
| HI-1  | 23.9%                  | 3.80x10 <sup>7</sup>                     | 3.84%               | 4.80x10 <sup>7</sup>                     | 2.64%                | 4.86x10 <sup>7</sup>                      |
| HI-2  | 19.5%                  | 4.0x10 <sup>7</sup>                      | 4.0%                | 4.80x10 <sup>7</sup>                     | 3.5%                 | 4.82x10 <sup>7</sup>                      |
| HI-3  | 29.4%                  | 3.53x10 <sup>7</sup>                     | 2.1%                | 4.89x10 <sup>7</sup>                     | 3.3%                 | 4.83x10 <sup>7</sup>                      |
